# Supplementary material for: Brewing plastics: OCT reveals microplastic release from nylon tea bags in simulated brewed tea infusions
Source: Royal Society of Chemistry journal article supplement (doi:10.1039/d5em00644a), 2026-01-01
Supplement: d5em00644a1.pdf [file d5em00644a1.pdf]

### Supplementary Information

#### **Brewing Plastics: OCT Reveals Microplastics Release from Nylon Tea Bags in Simulated Brewed Tea Infusions**

Pramoda Maheshi Jayasekara<sup>a,b,†</sup>, Praveen Abhishek<sup>c,†</sup>, Bimsara Sandaruwan  
Kahandawala<sup>b,d,†</sup>, Nisala Damith<sup>e</sup>, Manura Weerasinghe<sup>c</sup>, Nipun Shantha Kahatapitiya<sup>e</sup>,  
Bhagya Nathali Silva<sup>b,d</sup>, Shiromi Karunaratne<sup>f</sup>, Ruchire Eranga Wijesinghe<sup>a,b,\*</sup>, Udaya  
Wijenayake<sup>g,\*</sup>, Anushka Upamali Rajapaksha<sup>c,\*</sup>, Meththika Vithanage<sup>h,c</sup>

<sup>a</sup>. Department of Electrical and Electronic Engineering, Faculty of Engineering, Sri Lanka

Institute of Information Technology, Malabe 10115, Sri Lanka

<sup>b</sup>. Center for Excellence in Informatics, Electronics & Transmission (CIET), Sri Lanka

Institute of Information Technology, Malabe 10115, Sri Lanka

<sup>c</sup>. Ecosphere Resilience Research Centre, Faculty of Applied Sciences, University of Sri

Jayewardenepura, Nugegoda 10250, Sri Lanka

<sup>d</sup>. Department of Information Technology, Faculty of Computing, Sri Lanka Institute of

Information Technology, Malabe 10115, Sri Lanka

<sup>e</sup>. School of Electronic and Electrical Engineering, College of IT Engineering, Kyungpook

National University, 80, Daehak-ro, Buk-gu, Daegu 41566, Republic of Korea.

<sup>f</sup>. Department of Civil Engineering, Faculty of Engineering, Sri Lanka Institute of Information

Technology Malabe Campus, New Kandy Road, Malabe, 10115, Sri Lanka

<sup>g</sup>. Department of Computer Engineering, Faculty of Engineering, University of Sri

Jayewardenepura, Nugegoda 10250, Sri Lanka

<sup>h</sup>. Geological survey of Denmark and Greenland, Øster Voldgade 10, 1350

Copenhagen, Denmark

\*Corresponding Author: [anurajapaksha@sjp.ac.lk](mailto:anurajapaksha@sjp.ac.lk), [udayaw@sjp.ac.lk](mailto:udayaw@sjp.ac.lk), and [eranga.w@slit.lk](mailto:eranga.w@slit.lk)

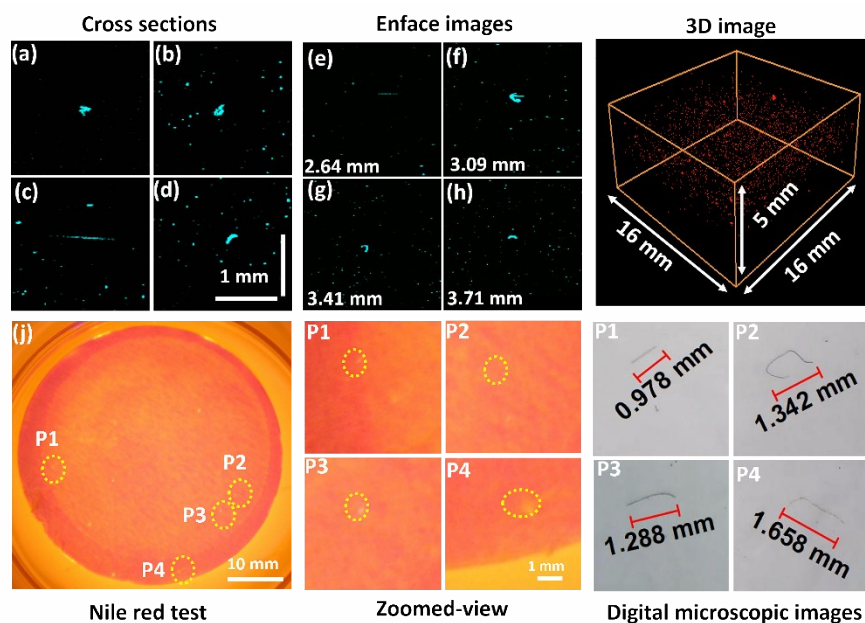

**Figure S1:** Detection of microplastics using OCT, Nile red staining, and digital microscopic imaging after steeping the tea bag for 1 minutes. ((a–d) inset images) OCT cross-sections with representative microplastics. ((e–h) inset images) Enface OCT images at 4 depths. (i) 3D visualisation of microplastics. (j) Sample after Nile red staining, indicating fluorescent microplastics at positions P1, P2, P3 and P4. The zoomed view shows a more precise visualisation of P1, P2, P3, and P4 and digital

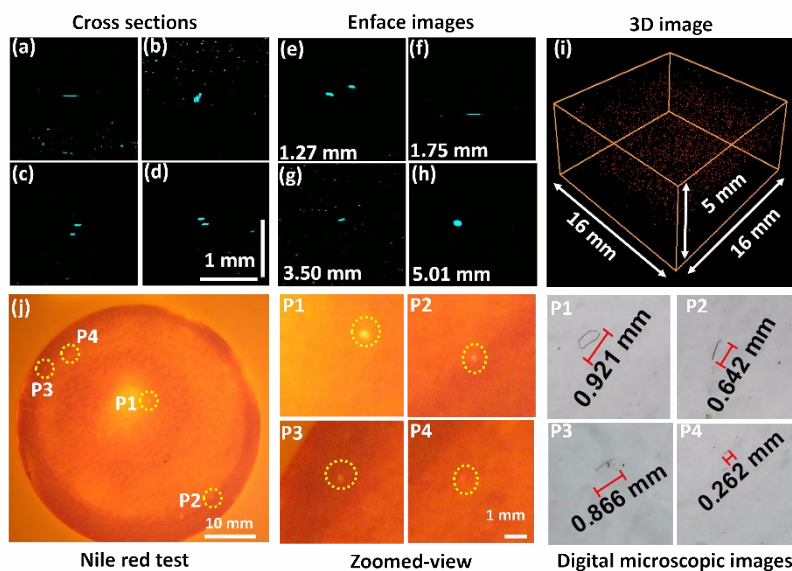

microscopic images for the microplastics corresponding to fluorescent particles.

**Figure S2** Detection of microplastics using OCT, Nile red staining, and digital microscopic imaging after steeping the tea bag for 3 minutes. ((a–d) inset images) OCT cross-sections with representative microplastics. ((e–h) inset images) Enface OCT images at 4 depths. (i) 3D visualisation of

microplastics. (j) Sample after Nile red staining, indicating fluorescent microplastics at positions P1, P2, P3 and P4. The zoomed view shows a more precise visualisation of P1, P2, P3, and P4 and digital microscopic images for the microplastics corresponding to fluorescent particles.

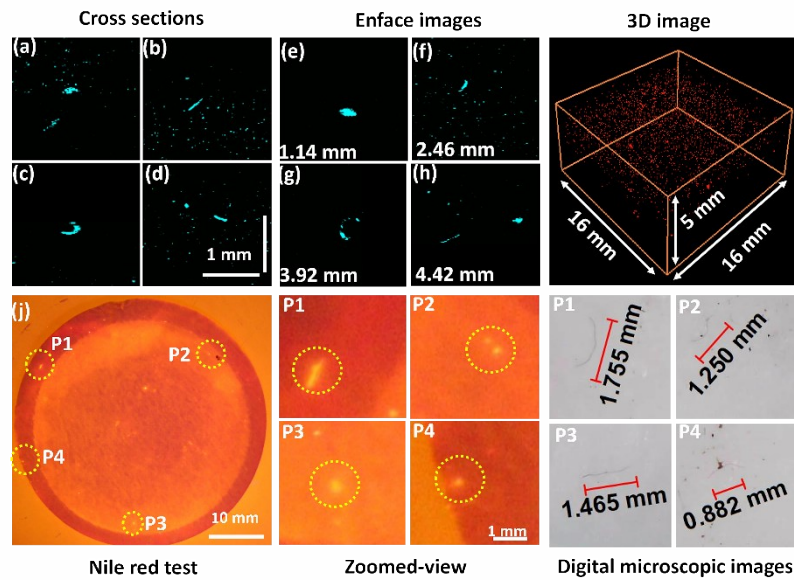

**Figure S3:** Detection of microplastics using OCT, Nile red staining, and digital microscopic imaging after steeping the tea bag for 5 minutes. ((a–d) inset images) OCT cross-sections with representative microplastics. ((e–h) inset images) Enface OCT images at 4 depths. (i) 3D visualisation of microplastics. (j) Sample after Nile red staining, indicating fluorescent microplastics at positions P1, P2, P3 and P4. The zoomed view shows a more precise visualisation of P1, P2, P3, and P4 and digital microscopic images for the microplastics corresponding to fluorescent particles.

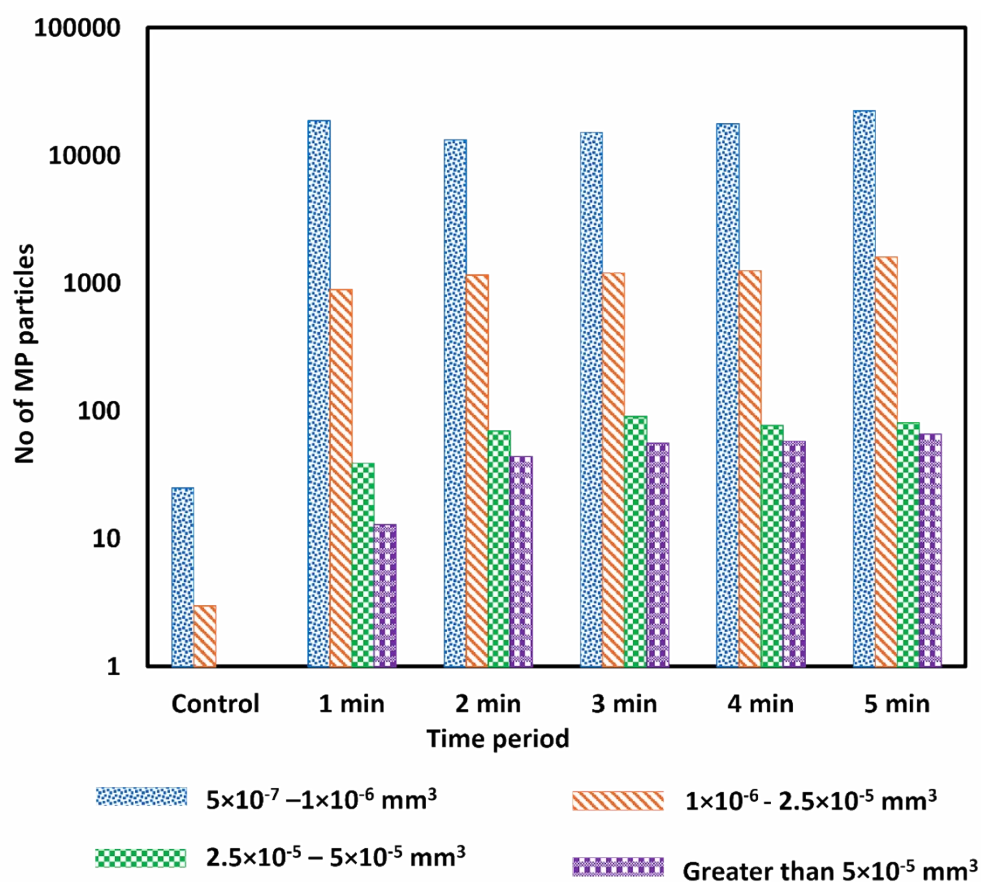

**Figure S4** Microplastic (MP) particle counts released from nylon tea bags at different steeping times (1–5 minutes), categorised by 4 volume ranges

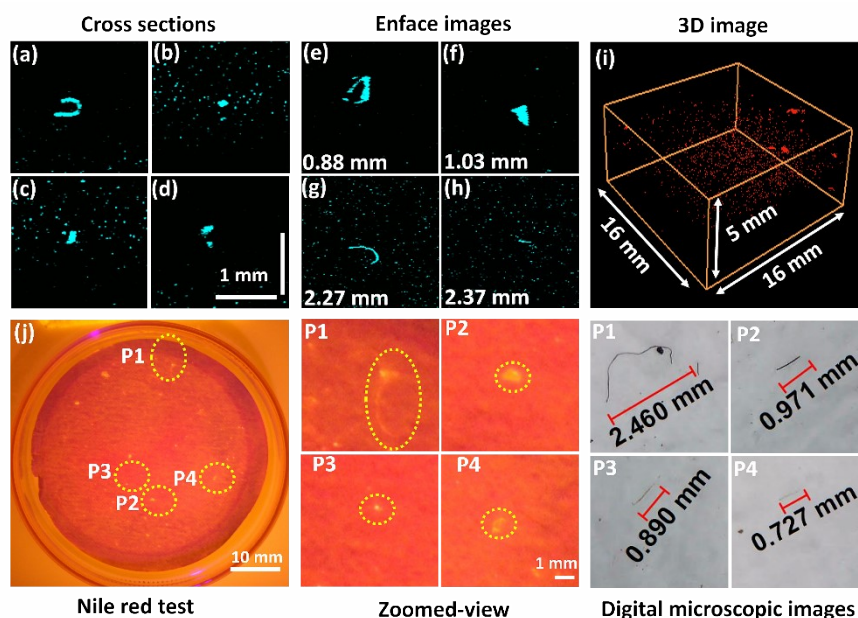

**Figure S5** Detection of microplastics using OCT, Nile red staining, and digital microscopic imaging after steeping the tea bag at 2 °C. (a–d) OCT cross-sections with representative MPs. (e–h) Enface OCT images at 4 depths. (i) 3D visualisation of MPs. (j) Sample after Nile red staining, indicating

fluorescent microplastics at positions P1, P2, P3, and P4. The zoomed view shows a more precise visualisation of P1, P2, P3, and P4 and digital microscopic images of the MPs corresponding to fluorescent particles.

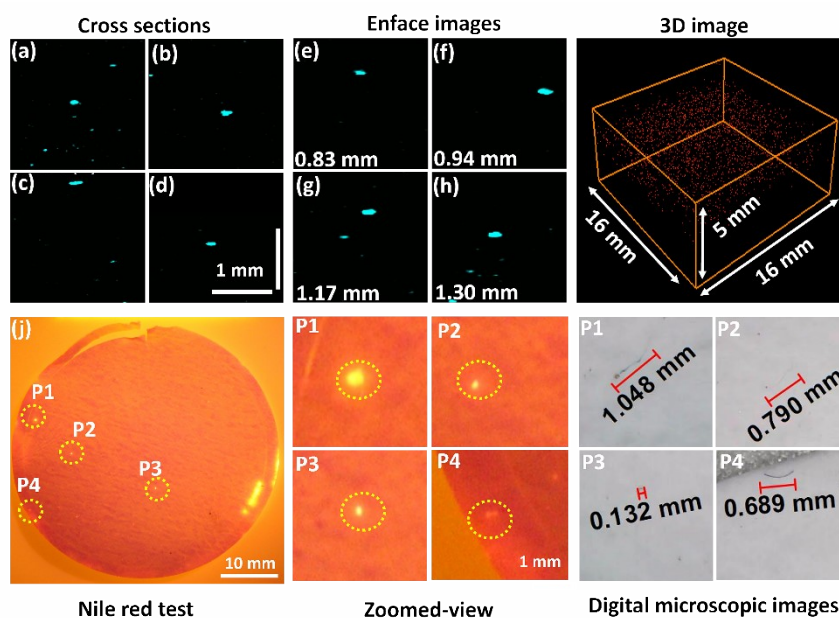

**Figure S6** Detection of microplastics using OCT, Nile red staining, and digital microscopic imaging after steeping the tea bag at 30 °C. (a–d) OCT cross-sections with representative microplastics. (e–h) Enface OCT images at 4 depths. (i) 3D visualisation of MPs. (j) Sample after Nile red staining, indicating fluorescent microplastics at positions P1, P2, P3, and P4. The zoomed view shows a more precise visualisation of P1, P2, P3, and P4, and digital microscopic images of the microplastics corresponding to fluorescent particles.



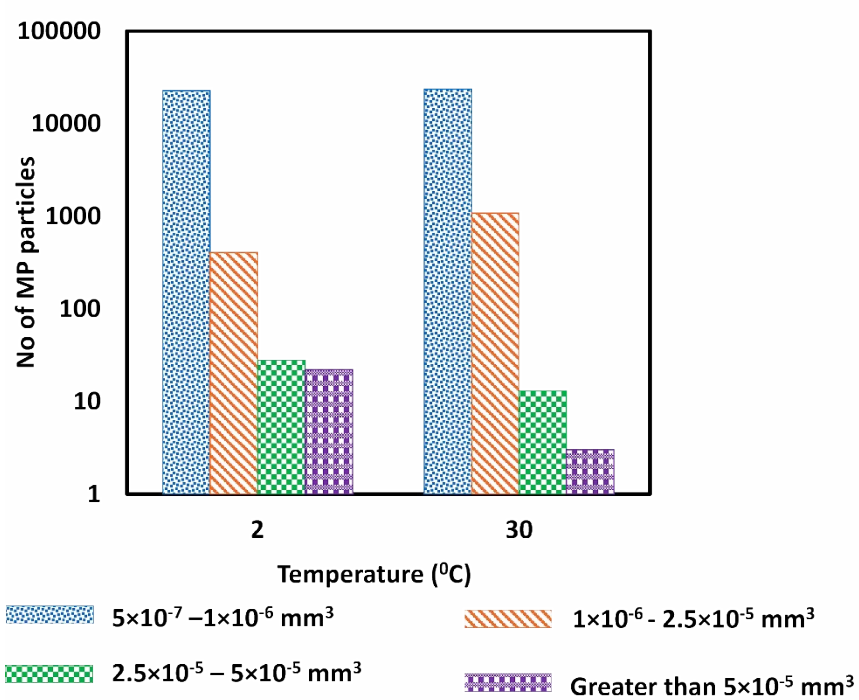

**Figure S7** Microplastic (MP) particle counts released from nylon tea bags at cold brewing, categorised by 4 volume ranges
